# Supplementary material for: Phylogeography and virulence structure of the powdery mildew population on its 'new' host triticale
Source: PubMed Central journal article supplement (PMC3457899; doi:10.1186/1471-2148-12-76), 2012-06-01
Supplement: 1471-2148-12-76-S2.pdf [file 1471-2148-12-76-S2.pdf]

## Additional files

### Additional file 2 – Infection types of isolates of *Blumeria graminis* collected from wheat and triticale in different regions in Europe on triticale cultivars

| Isolate code <sup>a</sup> | Infection types <sup>b</sup> of <i>Blumeria graminis</i> isolates on triticale cultivars |           |          |         |         |          |          |        |       |         |          |         |          |         |          |
|---------------------------|------------------------------------------------------------------------------------------|-----------|----------|---------|---------|----------|----------|--------|-------|---------|----------|---------|----------|---------|----------|
|                           | Lamberto                                                                                 | Krakowiak | Moderato | Grenado | Maximal | Grandval | Borodine | Ragtac | Joyce | Tribeca | Talentro | Cultivo | Agostino | Partout | Amarillo |
| BgTR_A21                  | 4                                                                                        | 4         | 1        | 0       | 4       | 4        | 3        | 4      | 4     | 4       | 4        | 0       | 4        | 4       | 3        |
| BgTR_A22                  | 4                                                                                        | 4         | 4        | 0       | 4       | 3        | 4        | 2      | 4     | 4       | 4        | 0       | 3        | 1       | 4        |
| BgTR_A23                  | 4                                                                                        | 4         | 4        | 0       | 4       | 4        | 4        | 4      | 3     | 3       | 3        | 0       | 3        | 1       | 3        |
| BgTR_A24                  | 2                                                                                        | 4         | 1        | 0       | 3       | 4        | 1        | 3      | 4     | 3       | 4        | 0       | 2        | 2       | 3        |
| BgTR_A25                  | 4                                                                                        | 4         | 1        | 0       | 4       | 4        | 4        | 3      | 4     | 4       | 4        | 0       | 4        | 3       | 0        |
| BgTR_A26                  | 3                                                                                        | 4         | 4        | 0       | 3       | 4        | 4        | 4      | 4     | 4       | 4        | 0       | 4        | 4       | 3        |
| BgTR_A27                  | 4                                                                                        | 4         | 3        | 0       | 4       | 4        | 4        | 4      | 4     | 4       | 4        | 0       | 4        | 1       | 4        |
| BgTR_A28                  | 3                                                                                        | 4         | 4        | 0       | 4       | 4        | 4        | 4      | 4     | 4       | 3        | 0       | 4        | 0       | 4        |
| BgTR_A29                  | 4                                                                                        | 4         | 4        | 0       | 4       | 4        | 2        | 1      | 3     | 2       | 2        | 0       | 3        | 0       | 4        |
| BgTR_A30                  | 4                                                                                        | 3         | 0        | 0       | 4       | 4        | 3        | 4      | 4     | 3       | 4        | 0       | 3        | 4       | 4        |
| BgTR_A31                  | 4                                                                                        | 4         | 3        | 0       | 4       | 4        | 4        | 4      | 4     | 4       | 4        | 0       | 4        | 4       | 3        |
| BgTR_A32                  | 3                                                                                        | 4         | 1        | 0       | 3       | 3        | 3        | 4      | 4     | 3       | 4        | 0       | 4        | 3       | 3        |
| BgTR_A33                  | 4                                                                                        | 4         | 4        | 0       | 4       | 4        | 4        | 3      | 4     | 4       | 4        | 0       | 4        | 4       | 0        |
| BgTR_A34                  | 4                                                                                        | 4         | 4        | 0       | 4       | 4        | 4        | 3      | 4     | 4       | 4        | 0       | 4        | 4       | 3        |
| BgTR_A35                  | 4                                                                                        | 4         | 2        | 0       | 4       | 4        | 3        | 4      | 4     | 4       | 4        | 0       | 4        | 2       | 3        |

| Isolate<br>code <sup>a</sup> | Infection types <sup>b</sup> of <i>Blumeria graminis</i> isolates on triticale cultivars |           |          |         |         |          |          |        |       |         |          |         |          |         |          |
|------------------------------|------------------------------------------------------------------------------------------|-----------|----------|---------|---------|----------|----------|--------|-------|---------|----------|---------|----------|---------|----------|
|                              | Lamberto                                                                                 | Krakowiak | Moderato | Grenado | Maximal | Grandval | Borodine | Ragtac | Joyce | Tribeca | Talentro | Cultivo | Agostino | Partout | Amarillo |
| BgTR_A36                     | 4                                                                                        | 4         | 3        | 0       | 4       | 4        | 4        | 4      | 4     | 4       | 3        | 0       | 4        | 2       | 1        |
| BgTR_A37                     | 2                                                                                        | 3         | 0        | 0       | 1       | 4        | 1        | 4      | 3     | 3       | 4        | 0       | 2        | 0       | 1        |
| BgS_A38                      | 0                                                                                        | 0         | 0        | 0       | 1       | 2        | 0        | 0      | 0     | 2       | 0        | 0       | 0        | 0       | 0        |
| BgS_A39                      | 0                                                                                        | 1         | 0        | 0       | 0       | 2        | 0        | 0      | 0     | 2       | 0        | 0       | 0        | 0       | 0        |
| Bgta_B2                      | 3                                                                                        | 1         | 4        | 0       | 3       | 4        | 4        | 4      | 4     | 4       | 1        | 0       | 3        | 1       | 4        |
| Bgta_B4                      | 4                                                                                        | 4         | 1        | 0       | 4       | 3        | 4        | 4      | 4     | 4       | 4        | 0       | 4        | 1       | 3        |
| Bgta_B5                      | 4                                                                                        | 4         | 4        | 0       | 4       | 4        | 4        | 4      | 4     | 4       | 3        | 0       | 4        | 4       | 4        |
| Bgta_B6                      | 3                                                                                        | 4         | 3        | 0       | 4       | 3        | 4        | 4      | 4     | 4       | 4        | 0       | 4        | 4       | 4        |
| Bgta_B7                      | 4                                                                                        | 4         | 2        | 0       | 4       | 4        | 3        | 4      | 4     | 4       | 4        | 0       | 4        | 1       | 4        |
| BgTR_B8                      | 2                                                                                        | 4         | 0        | 0       | 4       | 3        | 1        | 0      | 0     | 4       | 0        | 0       | 2        | 4       | 3        |
| BgTR_B9                      | 4                                                                                        | 4         | 1        | 0       | 4       | 4        | 4        | 3      | 4     | 4       | 4        | 0       | 4        | 4       | 4        |
| BgTR_B10                     | 3                                                                                        | 3         | 2        | 0       | 4       | 4        | 4        | 4      | 4     | 4       | 3        | 0       | 4        | 1       | 1        |
| BgTR_B11                     | 4                                                                                        | 4         | 3        | 0       | 4       | 4        | 4        | 3      | 4     | 3       | 4        | 0       | 4        | 3       | 1        |
| BgTR_B12                     | 3                                                                                        | 4         | 3        | 0       | 4       | 4        | 4        | 4      | 4     | 4       | 4        | 0       | 4        | 4       | 3        |
| BgTR_B13                     | 4                                                                                        | 4         | 3        | 0       | 4       | 4        | 2        | 1      | 2     | 4       | 1        | 0       | 3        | 3       | 3        |
| BgTR_B14                     | 4                                                                                        | 4         | 1        | 0       | 4       | 3        | 4        | 4      | 3     | 4       | 3        | 0       | 3        | 4       | 2        |
| BgTR_B15                     | 4                                                                                        | 4         | 2        | 0       | 4       | 4        | 4        | 4      | 4     | 4       | 4        | 0       | 3        | 2       | 1        |
| BgTR_B16                     | 4                                                                                        | 4         | 1        | 0       | 4       | 4        | 3        | 4      | 4     | 4       | 3        | 0       | 4        | 4       | 4        |
| BgTR_C2                      | 3                                                                                        | 4         | 0        | 0       | 4       | 3        | 2        | 4      | 4     | 3       | 3        | 0       | 4        | 3       | 3        |
| BgTR_C3                      | 4                                                                                        | 4         | 4        | 0       | 4       | 4        | 0        | 0      | 0     | 4       | 0        | 0       | 0        | 1       | 4        |

| Isolate code <sup>a</sup> | Infection types <sup>b</sup> of <i>Blumeria graminis</i> isolates on triticale cultivars |           |          |         |         |          |          |        |       |         |          |         |          |         |          |
|---------------------------|------------------------------------------------------------------------------------------|-----------|----------|---------|---------|----------|----------|--------|-------|---------|----------|---------|----------|---------|----------|
|                           | Lamberto                                                                                 | Krakowiak | Moderato | Grenado | Maximal | Grandval | Borodine | Ragtag | Joyce | Tribeca | Talentro | Cultivo | Agostino | Partout | Amarillo |
| BgTR_C4                   | 4                                                                                        | 4         | 3        | 0       | 4       | 1        | 4        | 3      | 3     | 3       | 4        | 0       | 4        | 1       | 4        |
| BgTR_C5                   | 4                                                                                        | 4         | 1        | 0       | 4       | 3        | 4        | 3      | 3     | 4       | 4        | 0       | 4        | 3       | 2        |
| BgTR_C6                   | 4                                                                                        | 4         | 2        | 0       | 4       | 3        | 4        | 3      | 4     | 4       | 3        | 0       | 4        | 3       | 0        |
| BgTR_C7                   | 4                                                                                        | 4         | 4        | 0       | 4       | 4        | 3        | 4      | 4     | 3       | 4        | 4       | 4        | 2       | 1        |
| BgTR_C8                   | 4                                                                                        | 4         | 4        | 1       | 4       | 4        | 3        | 4      | 3     | 2       | 4        | 4       | 4        | 1       | 2        |
| BgTR_C9                   | 3                                                                                        | 4         | 4        | 0       | 4       | 4        | 4        | 4      | 4     | 3       | 4        | 0       | 4        | 4       | 1        |
| BgTR_C10                  | 4                                                                                        | 3         | 3        | 0       | 4       | 4        | 1        | 4      | 4     | 2       | 3        | 3       | 3        | 3       | 1        |

<sup>a</sup>Isolate codes represent isolates collected from different hosts at different locations: BgTR triticale, Bgta wheat, BgS rye; A Belgium, B France, and C Poland. Detailed information about the sampling location and year of collection are shown in additional file 3. Only isolates pathogenic on triticale are presented, the remaining isolates resulted in a score 0 on all triticale cultivars.

<sup>b</sup>The 0-4 scale [40,41] for infection types was converted into a binary code of 1 (scores 2-4) and 0 (scores 0-1) that corresponded to virulence or avirulence of the isolate to a cultivar, respectively.
