# Supplementary material for: Phylogeography and virulence structure of the powdery mildew population on its 'new' host triticale
Source: PubMed Central journal article supplement (PMC3457899; doi:10.1186/1471-2148-12-76), 2012-06-01
Supplement: 1471-2148-12-76-S3.pdf [file 1471-2148-12-76-S3.pdf]

## Additional files

### Additional file 3 – Isolates of *Blumeria graminis* included in this study

Source host, isolate code, sampling location, year of collection and GenBank accession numbers are given when available.

| Source host <sup>a</sup> | Isolate code | Sampling location   | Year of collection | <i>tub2</i> | <i>EF1α</i> <sup>b</sup> |
|--------------------------|--------------|---------------------|--------------------|-------------|--------------------------|
| <i>Triticum aestivum</i> | Bgta_A1      | Belgium, Zwevegem   | 2009               | JQ268160    | JQ268188                 |
|                          | Bgta_A2      | Belgium, Zwevegem   | 2009               | JQ268114    | JQ268209                 |
|                          | Bgta_A3      | Belgium, Zwevegem   | 2009               | JQ268096    | JQ268196                 |
|                          | Bgta_A4      | Belgium, Zwevegem   | 2009               | JQ268095    | JQ268213                 |
|                          | Bgta_A5      | Belgium, Melle      | 2009               | JQ268110    | JQ268193                 |
|                          | Bgta_A6      | Belgium, Melle      | 2009               | JQ268116    | JQ268216                 |
|                          | Bgta_A7      | Belgium, Melle      | 2009               | JQ268093    | JQ268207                 |
|                          | Bgta_A8      | Belgium, Melle      | 2009               | JQ268121    | JQ268204                 |
|                          | Bgta_A9      | Belgium, Tongeren   | 2009               | JQ268158    | JQ268200                 |
|                          | Bgta_A10     | Belgium, Tongeren   | 2010               | JQ268111    | JQ268212                 |
|                          | Bgta_A11     | Belgium, Tongeren   | 2010               | JQ268094    | JQ268206                 |
|                          | Bgta_A12     | Belgium, Tongeren   | 2010               | JQ268098    | JQ268202                 |
|                          | Bgta_A13     | Belgium, Verrebroek | 2009               | JQ268118    | JQ268225                 |
|                          | Bgta_A14     | Belgium, Verrebroek | 2009               | JQ268092    | JQ268210                 |
|                          | Bgta_A15     | Belgium, Verrebroek | 2009               | JQ268106    | JQ268221                 |
|                          | Bgta_A16     | Belgium, Verrebroek | 2009               | JQ268107    | JQ268224                 |
|                          | Bgta_A17     | Belgium, Verrebroek | 2010               | JQ268112    | JQ268194                 |
|                          | Bgta_A18     | Belgium, Alveringem | 2009               | JQ268117    | JQ268230                 |
|                          | Bgta_A19     | Belgium, Bottelare  | 2010               | JQ268099    | JQ268195                 |
|                          | Bgta_A20     | Belgium, Bottelare  | 2009               | JQ268103    | JQ268222                 |
| Triticale                | BgTR_A21     | Belgium, Melle      | 2009               | JQ268126    | JQ268171                 |

|                          |          |                            |      |          |          |
|--------------------------|----------|----------------------------|------|----------|----------|
|                          | BgTR_A22 | Belgium, Melle             | 2009 | JQ268141 | JQ268180 |
|                          | BgTR_A23 | Belgium, Melle             | 2009 | JQ268144 | JQ268164 |
|                          | BgTR_A24 | Belgium, Bocholt           | 2009 | JQ268151 | JQ268184 |
|                          | BgTR_A25 | Belgium, Bocholt           | 2010 | JQ268137 | JQ268191 |
|                          | BgTR_A26 | Belgium, Bocholt           | 2010 | JQ268129 | JQ268167 |
|                          | BgTR_A27 | Belgium, Bocholt           | 2010 | JQ268153 | JQ268190 |
|                          | BgTR_A28 | Belgium, Hoogstraten       | 2009 | JQ268125 | JQ268199 |
|                          | BgTR_A29 | Belgium, Hoogstraten       | 2009 | JQ268163 | -        |
|                          | BgTR_A30 | Belgium, Hoogstraten       | 2010 | JQ268135 | JQ268231 |
|                          | BgTR_A31 | Belgium, Hoogstraten       | 2010 | JQ268152 | JQ268166 |
|                          | BgTR_A32 | Belgium, Sint-Niklaas      | 2010 | JQ268138 | JQ268197 |
|                          | BgTR_A33 | Belgium, Sint-Niklaas      | 2010 | JQ268123 | JQ268170 |
|                          | BgTR_A34 | Belgium, Sint-Niklaas      | 2010 | JQ268154 | JQ268208 |
|                          | BgTR_A35 | Belgium, Bottelare         | 2010 | JQ268133 | JQ268182 |
|                          | BgTR_A36 | Belgium, Bottelare         | 2010 | JQ268145 | JQ268175 |
|                          | BgTR_A37 | Belgium, Kerkhove          | 2009 | JQ268147 | JQ268215 |
| <i>Secale cereale</i>    | BgS_A38  | Belgium, Bottelare         | 2010 | JQ268149 | JQ268183 |
|                          | BgS_A39  | Belgium, Bottelare         | 2010 | JQ268156 | JQ268179 |
| <i>Triticum aestivum</i> | Bgta_B1  | France, Clermont-Ferrand   | 2009 | JQ268120 | JQ268198 |
|                          | Bgta_B2  | France, Bergerac           | 2009 | JQ268127 | JQ268165 |
|                          | Bgta_B3  | France, Cappelle-en-Pévèle | 2010 | JQ268108 | JQ268223 |
|                          | Bgta_B4  | France, Cappelle-en-Pévèle | 2010 | JQ268136 | JQ268174 |
|                          | Bgta_B5  | France, Cappelle-en-Pévèle | 2010 | JQ268161 | -        |
|                          | Bgta_B6  | France, Cappelle-en-Pévèle | 2010 | JQ268102 | JQ268172 |
|                          | Bgta_B7  | France, Cappelle-en-Pévèle | 2010 | JQ268128 | JQ268181 |
| Triticale                | BgTR_B8  | France, Clermont-Ferrand   | 2009 | JQ268139 | JQ268178 |

|                           |           |                            |        |          |          |
|---------------------------|-----------|----------------------------|--------|----------|----------|
|                           | BgTR_B9   | France, Rennes             | 2009   | JQ268157 | -        |
|                           | BgTR_B10  | France, Cappelle-en-Pévèle | 2010   | JQ268132 | JQ268169 |
|                           | BgTR_B11  | France, Cappelle-en-Pévèle | 2010   | JQ268134 | JQ268168 |
|                           | BgTR_B12  | France, Cappelle-en-Pévèle | 2010   | JQ268122 | JQ268173 |
|                           | BgTR_B13  | France, Drôme              | 2010   | JQ268131 | JQ268185 |
|                           | BgTR_B14  | France, Drôme              | 2010   | JQ268155 | JQ268177 |
|                           | BgTR_B15  | France, Druelle            | 2010   | JQ268100 | JQ268187 |
|                           | BgTR_B16  | France, Druelle            | 2010   | JQ268097 | JQ268186 |
| <i>Triticum aestivum</i>  | Bgta_C1   | Poland, Bakow              | 2009   | JQ268101 | JQ268217 |
| Triticale                 | BgTR_C2   | Poland, Bakow              | 2009   | JQ268124 | JQ268220 |
|                           | BgTR_C3   | Poland, Uhnin              | 2009   | JQ268162 | JQ268227 |
|                           | BgTR_C4   | Poland, Bakow              | 2009   | JQ268143 | JQ268214 |
|                           | BgTR_C5   | Poland, Bakow              | 2009   | JQ268142 | JQ268176 |
|                           | BgTR_C6   | Poland, Bakow              | 2009   | JQ268140 | JQ268218 |
|                           | BgTR_C7   | Poland, Maslowice          | 2010   | JQ268148 | JQ268228 |
|                           | BgTR_C8   | Poland, Maslowice          | 2010   | JQ268150 | JQ268219 |
|                           | BgTR_C9   | Poland, Malyszyn           | 2010   | JQ268146 | JQ268211 |
|                           | BgTR_C10  | Poland, Karznicka          | 2010   | JQ268130 | JQ268229 |
| <i>Triticum aestivum</i>  | Bgta_D1   | Israel, Be'eri             | 1980's | JQ268115 | JQ268203 |
|                           | Bgta_D2   | Israel, Yesodot            | 1980's | JQ268109 | JQ268201 |
|                           | Bgta_D3   | Israel, Nahal Oz           | 1980's | JQ268119 | JQ268205 |
| <i>Triticum durum</i>     | Bgtd_D4   | Israel, Bet Dagan          | 1980's | JQ268159 | -        |
|                           | Bgtd_D5   | Israel, Hula               | 1980's | JQ268113 | JQ268189 |
|                           | Bgtd_D6   | Israel, Negba              | 1980's | JQ268105 | JQ268192 |
| <i>Triticum diccoides</i> | Bgtdic_D7 | Israel, Ami'ad             | 1980's | JQ268104 | JQ268226 |

<sup>a</sup>All isolates below, until the next listed source host, were sampled on the same source host.

<sup>b</sup>We were unable to obtain *EFl* $\alpha$  sequences for the isolates BgTR\_A29, Bgta\_B5, BgTR\_B9 and Bgtd\_D4.
